# Supplementary material for: Co/Co9S8@carbon nanotubes on a carbon sheet: facile controlled synthesis, and application to electrocatalysis in oxygen reduction/oxygen evolution reactions, and to a rechargeable Zn-air battery
Source: Royal Society of Chemistry journal article supplement (doi:10.1039/d0qi01155j), 2020-11-05
Supplement: d0qi01155j1.pdf [file d0qi01155j1.pdf]

# **Co/Co<sub>9</sub>S<sub>8</sub>@Carbon Nanotubes on Carbon Sheet: Facile Controlled Synthesis, Electrocatalysis on Oxygen Reduction Reaction/Oxygen Evolution Reaction, and Application on Rechargeable Zn-air Battery**

Han-Ming Zhang, †<sup>a,b</sup> Chunyan Hu, †<sup>b</sup>, Muwei Ji,<sup>\*b</sup> Minjie Wang,<sup>b</sup> Jiali Yu,<sup>b</sup>  
Huichao Liu,<sup>b</sup> Caizhen Zhu,<sup>\*b</sup> and Jian Xu<sup>b</sup>

a. Hebei Key Laboratory of Material Near-Net Forming Technology, School of Materials Science and Engineering, Hebei University of Science and Technology, Shijiazhuang, 050018, P. R. China.

b. Institute of Low-dimensional Materials Genome Initiative, College of Chemistry and Environmental Engineering, Shenzhen University, Shenzhen, Guangdong, 518060, P. R. China.

† The authors contributed equally in this work.

Corresponding Author:

[jimuwei@163.com](mailto:jimuwei@163.com) (Muwei Ji)

[czzhu@szu.edu.cn](mailto:czzhu@szu.edu.cn) (Caizhen Zhu).

## Experiment:

**ORR test:** The ORR polarization curves were measured at predefined rotation rates and a scan rate of  $10 \text{ mV s}^{-1}$  in  $\text{O}_2$  and  $\text{N}_2$ -saturated  $0.1 \text{ M KOH}$  electrolyte for deduction background. The 5000 potential cycles of the optimal catalyst were tested in  $\text{O}_2$ -saturated  $0.1 \text{ M KOH}$  electrolyte at a scan rate of  $50 \text{ mV s}^{-1}$  ( $0.2$ - $1.0 \text{ V}$  vs. RHE) for ORR long term durability test.

Based on the RRDE measurement, the change of  $n$  values per oxygen molecule in oxygen reduction can also be calculated according to Equation (1), and the corresponding generation rates of  $\text{H}_2\text{O}_2$  can be calculated according to Equation (2):

$$n = 4 \times \frac{|I_d|}{|I_d| + I_r/N} \quad \text{Equation (1)}$$

$$\text{H}_2\text{O}_2\% = 200 \times \frac{I_r/N}{|I_d| + I_r/N} \quad \text{Equation (2)}$$

where  $I_d$  is the disk current,  $I_r$  is the ring current, and  $N$  is the current collection efficiency of Pt ring.  $N$  was calculated to be  $0.37$  for the reduction of  $\text{K}_3\text{Fe}(\text{CN})_6$ .

**OER test:** The OER polarization curves were measured with a scan rate of  $5.0 \text{ mV s}^{-1}$  at room temperature in  $\text{N}_2$  and  $\text{O}_2$ -saturated  $1.0 \text{ M KOH}$ , respectively. Before OER polarization curve tests, the cyclic voltammetry was tested with a scan rate of  $50 \text{ mV s}^{-1}$  for OER ( $1.0$ - $1.9 \text{ V}$  vs. RHE), respectively.

All potentials were auto  $iR$ -compensated. The diameter of the rotating disk electrode (RDE) with a glassy carbon disk was  $5 \text{ mm}$ , which was used as the substrate for the

working electrode. In the whole measurement, the Ag/AgCl-saturated KCl electrode was used as the reference electrode. The counter electrode was a Pt wire in the ORR and OER measurement.

The measured potentials were converted to the reversible hydrogen electrode (RHE) using the following Equation (3):

$$V_{RHE} = V_{Ag/AgCl} + V_{Ag/AgCl}^0 + 0.059 pH \quad \text{Equation (3)}$$

where  $V_{Ag/AgCl}^0$  was 0.197 V at room temperature and pH is 13 of 0.1 M KOH, and 14 of 1.0 M KOH.

**Aqueous Zn-air Battery Measurements:** The homemade air cathode consisted of Co/Co<sub>9</sub>S<sub>8</sub>@CNTs-900 catalyst layer on the gas diffusion layer. The loading of catalyst is 2 mg cm<sup>-2</sup>. For comparison, air cathode equipped with the same loading of 20 wt% Pt/C and RuO<sub>2</sub> (mass ratio 1:1) catalyst was also tested. A polished Zn plate with a thickness of 0.05 mm was used as the anode.

Figure S1 to S

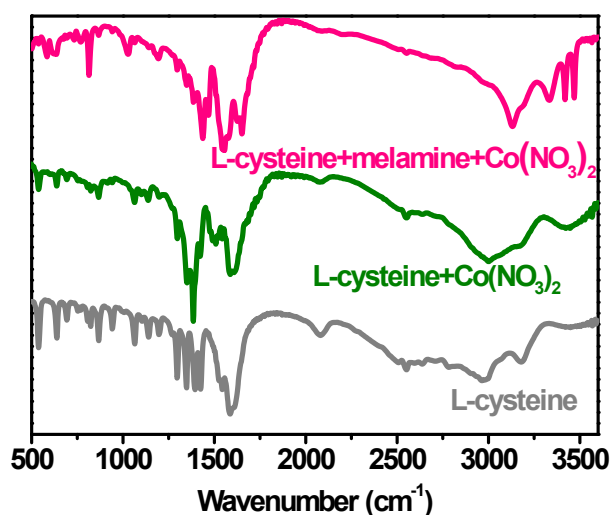

**Figure S1.** FTIR spectrum of the original L-cysteine (gray line); the mixture of L-cysteine and Co(NO<sub>3</sub>)<sub>2</sub> (green line); the mixture of L-cysteine, melamine and Co(NO<sub>3</sub>)<sub>2</sub> after grinding for 20 min. The FTIR spectrum shows that vibration of L-cysteine change obviously. The peaks around 1300 cm<sup>-1</sup> become weaker and a new peak at 1384 cm<sup>-1</sup> produces, which illustrate the coordination of Co<sup>2+</sup> and L-cysteine.

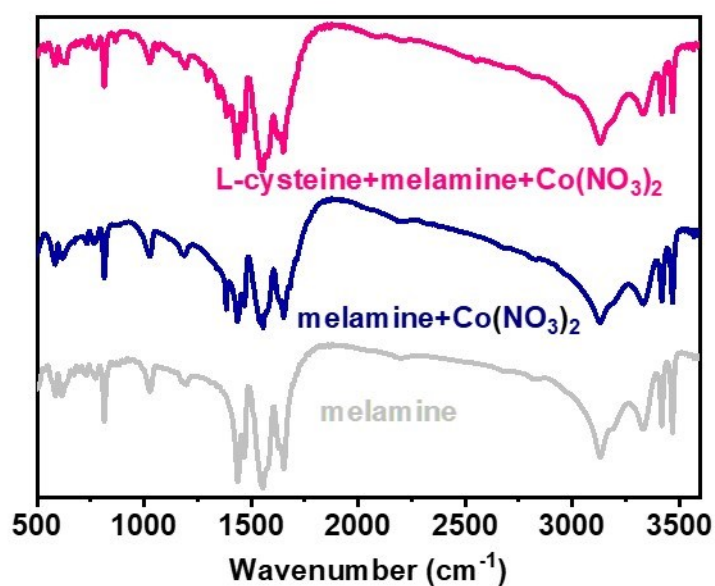

**Figure S2.** FTIR spectrum of the original melamine, melamine+ Co(NO<sub>3</sub>)<sub>2</sub> and L-cysteine+melamine+Co(NO<sub>3</sub>)<sub>2</sub>. The FTIR spectrum shows that after grinding with Co(NO<sub>3</sub>)<sub>2</sub>, the vibration of melamine remain well, which reveal that the melamine is inert to Co(NO<sub>3</sub>)<sub>2</sub> and no coordination occurs.

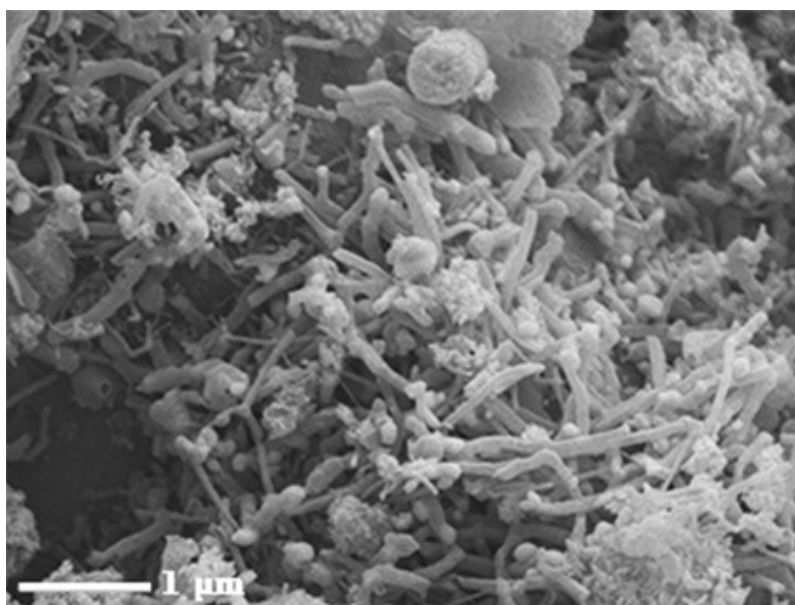

**Figure S3.** FE-SEM images of Co/Co<sub>9</sub>S<sub>8</sub>@CNTs-900.

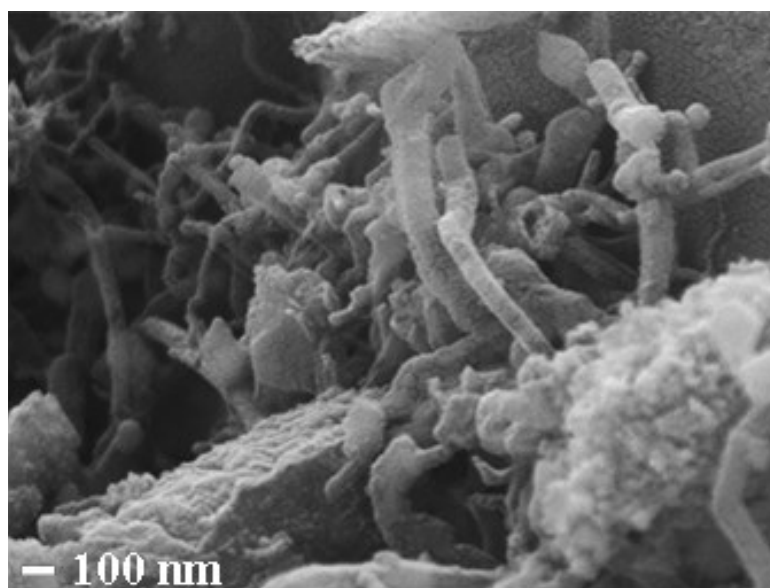

**Figure S4.** SEM image of Co/Co<sub>9</sub>S<sub>8</sub>@CNTs-800.

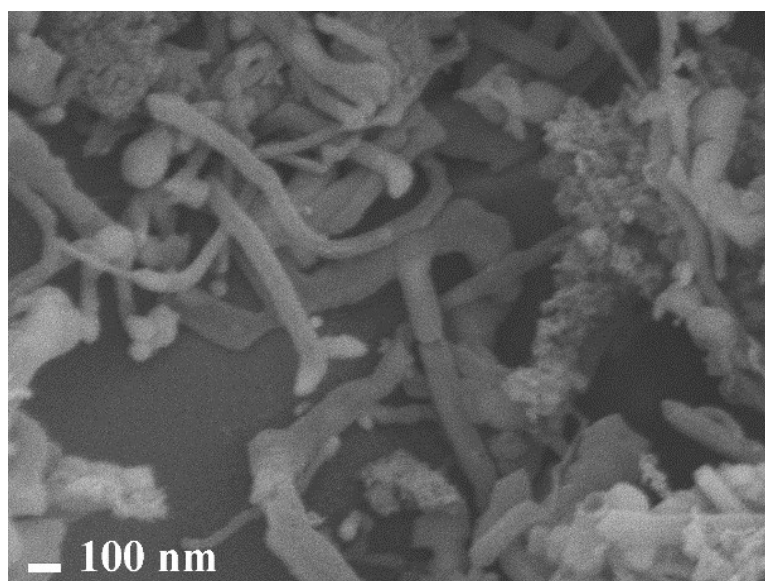

**Figure S5.** SEM image of Co/Co<sub>9</sub>S<sub>8</sub>@CNTs-1000.

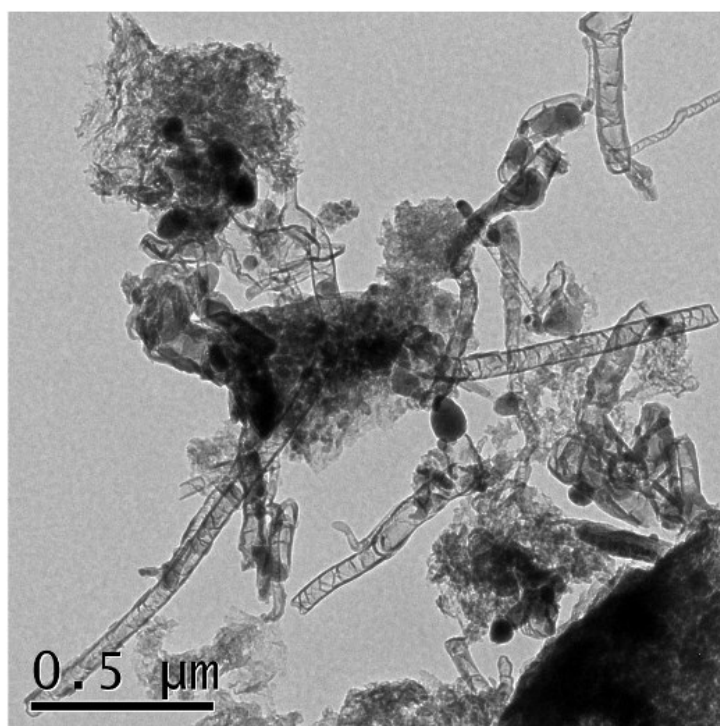

**Figure S6.** TEM images of Co/Co<sub>9</sub>S<sub>8</sub>@CNTs-900.

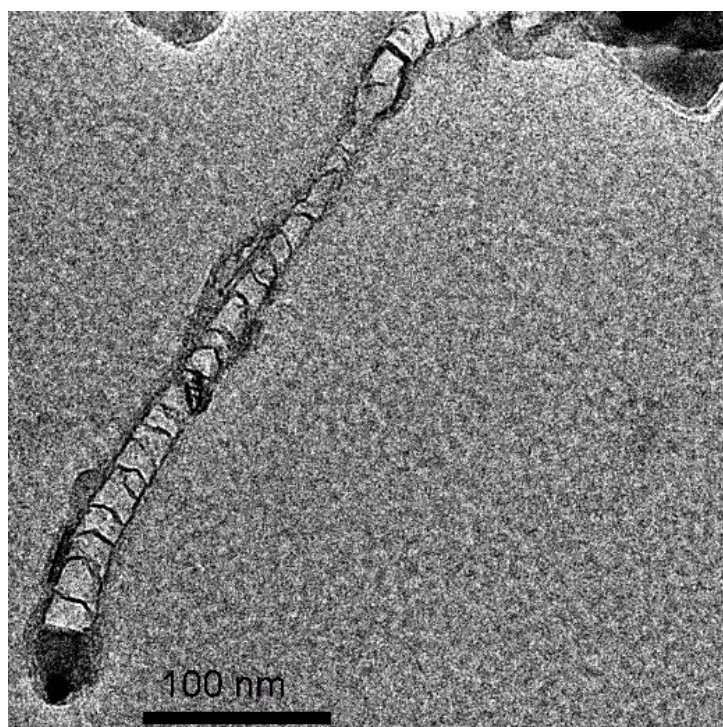

**Figure S7.** TEM images of Co/Co<sub>9</sub>S<sub>8</sub>@CNTs-800.

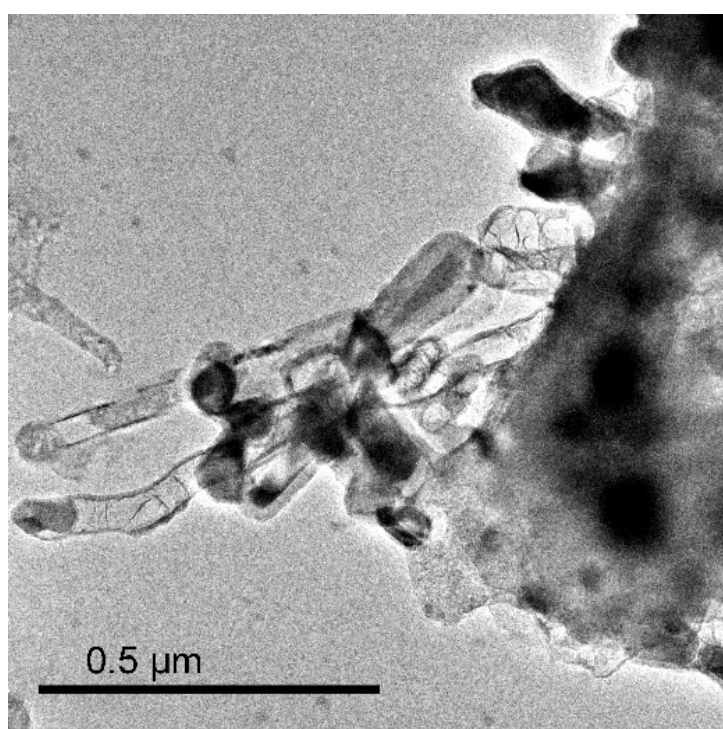

**Figure S8.** TEM images of Co/Co<sub>9</sub>S<sub>8</sub>@CNTs-1000.

**Table S1.** Surface area and pore volume of various samples.

| Sample                                       | Surface area<br>(m <sup>2</sup> g <sup>-1</sup> ) | Pore volume<br>(cm <sup>3</sup> g <sup>-1</sup> ) |
|----------------------------------------------|---------------------------------------------------|---------------------------------------------------|
| Co/Co <sub>9</sub> S <sub>8</sub> @CNTs-800  | 103.3                                             | 0.13                                              |
| Co/Co <sub>9</sub> S <sub>8</sub> @CNTs-900  | 228.8                                             | 0.35                                              |
| Co/Co <sub>9</sub> S <sub>8</sub> @CNTs-1000 | 265.3                                             | 0.39                                              |

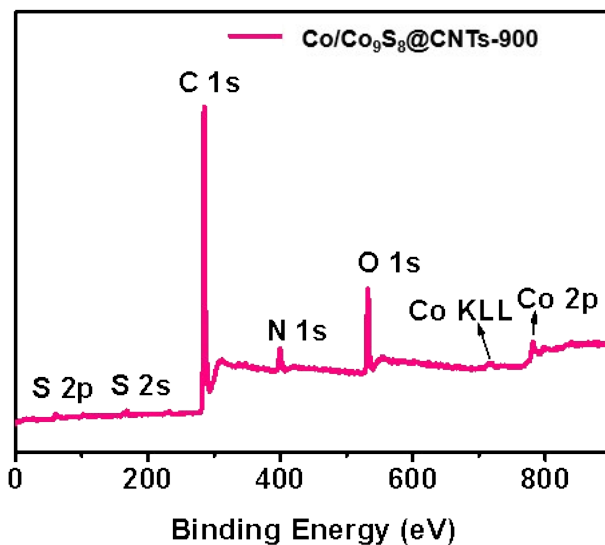

**Figure S9.** XPS survey spectrum of Co/Co<sub>9</sub>S<sub>8</sub>@CNTs-900.

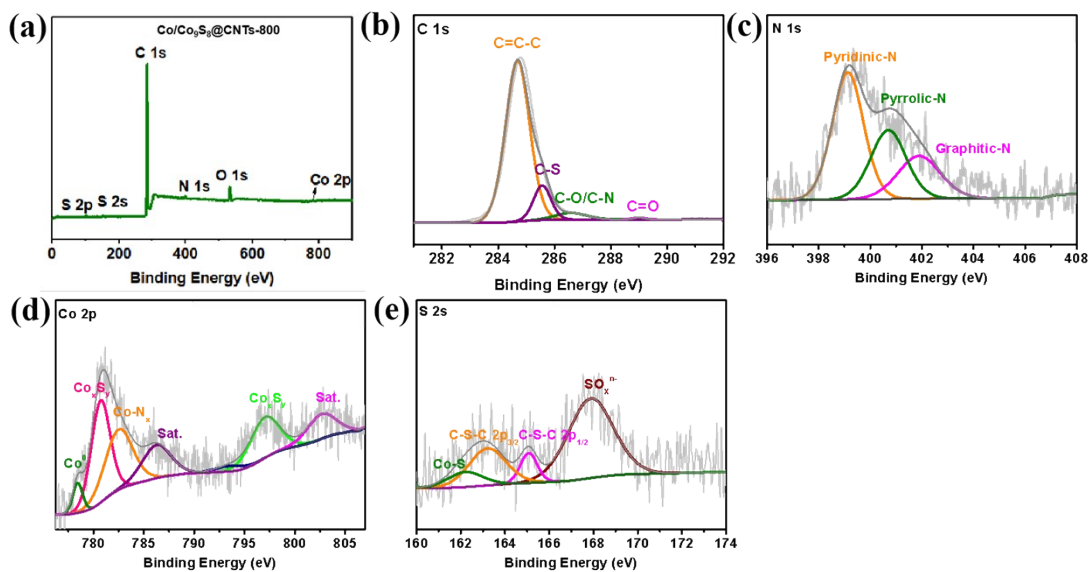

**Figure S10.** (a) XPS survey spectrum of Co/Co<sub>9</sub>S<sub>8</sub>@CNTs-800. High-resolution



spectrum of (b) C 1s, (c) N 1s, (d) Co 2p, and (e) S 2p for Co/Co<sub>9</sub>S<sub>8</sub>@CNTs-800.

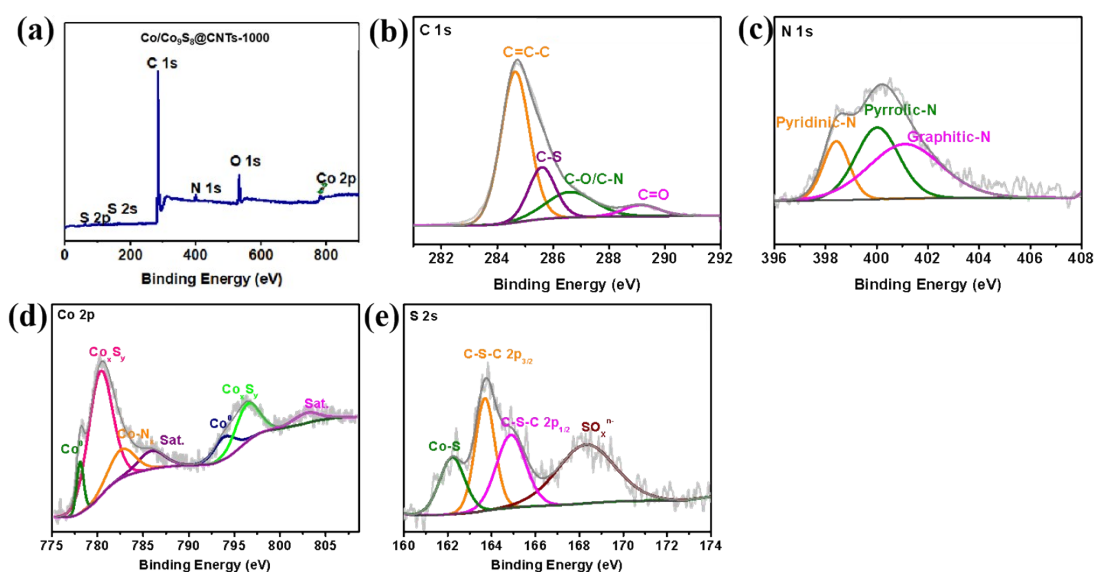

**Figure S11.** (a) XPS survey spectrum of Co/Co<sub>9</sub>S<sub>8</sub>@CNTs-1000. High-resolution spectrum of (b) C 1s, (c) N 1s, (d) Co 2p and (e) S 2p for Co/Co<sub>9</sub>S<sub>8</sub>@CNTs-1000.

**Table S2.** Surface elemental contents in various samples from XPS survey spectrum.

|                                              | C     | N    | O     | S    | Co   |
|----------------------------------------------|-------|------|-------|------|------|
| Co/Co <sub>9</sub> S <sub>8</sub> @CNTs-800  | 92.56 | 1.39 | 5.53  | 0.19 | 0.32 |
| Co/Co <sub>9</sub> S <sub>8</sub> @CNTs-900  | 80.94 | 5.25 | 11.38 | 1.15 | 1.27 |
| Co/Co <sub>9</sub> S <sub>8</sub> @CNTs-1000 | 86.26 | 3.26 | 8.98  | 0.79 | 0.71 |

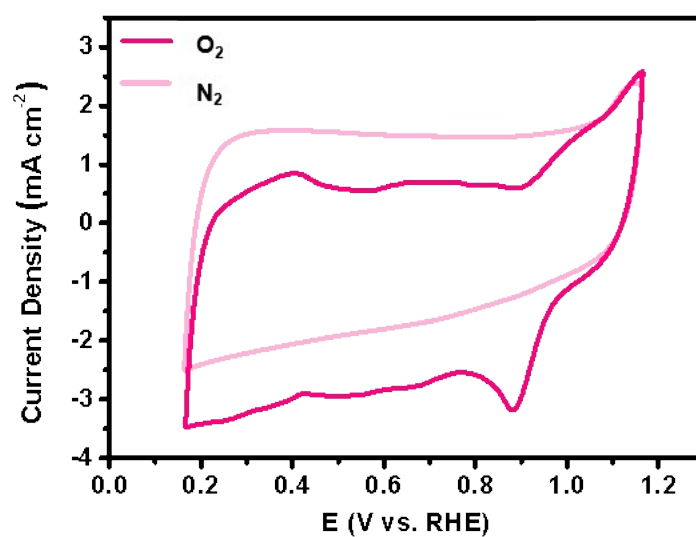

**Figure S12.** CV curves of Co/Co<sub>9</sub>S<sub>8</sub>@CNTs-900 in O<sub>2</sub>- and N<sub>2</sub>-saturated 0.1 M KOH solution with a sweep rate of 50 mV s<sup>-1</sup>.

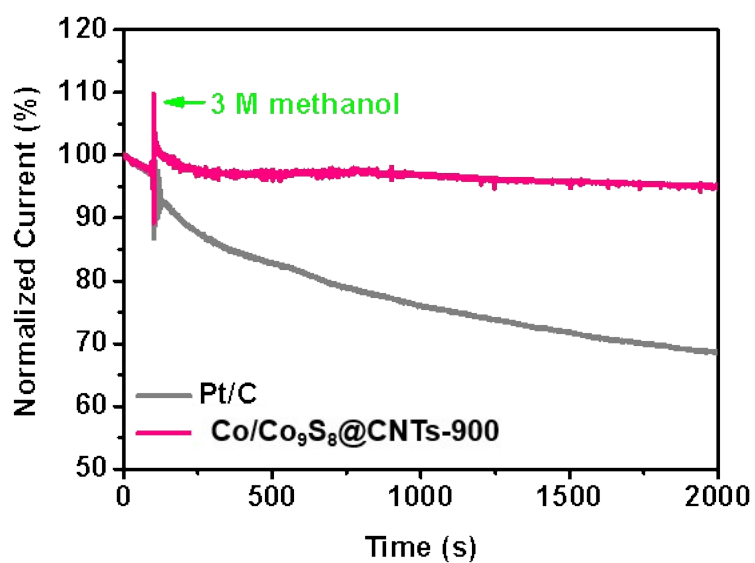

**Figure S13.** Methanol crossover tests for Co/Co<sub>9</sub>S<sub>8</sub>@CNTs-900 and 20 wt% Pt/C catalyst by adding 3 M methanol into the electrolyte at 100 s.

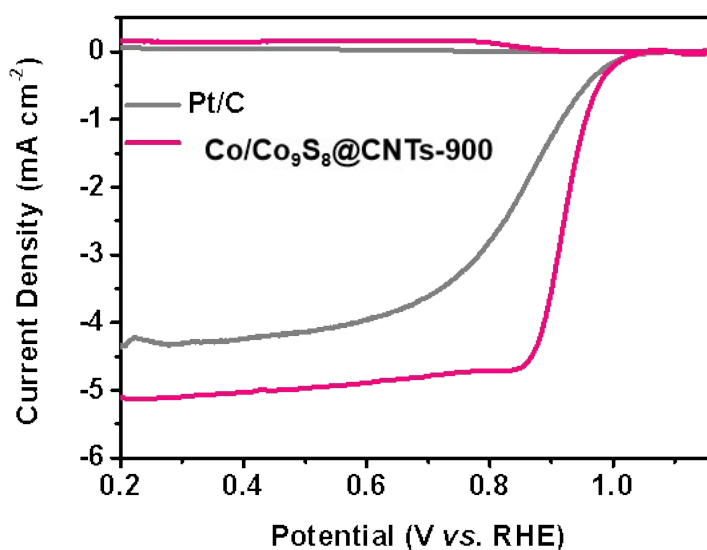

**Figure S14.** RRDE curves of Co/Co<sub>9</sub>S<sub>8</sub>@CNTs-900 and 20 wt% Pt/C.

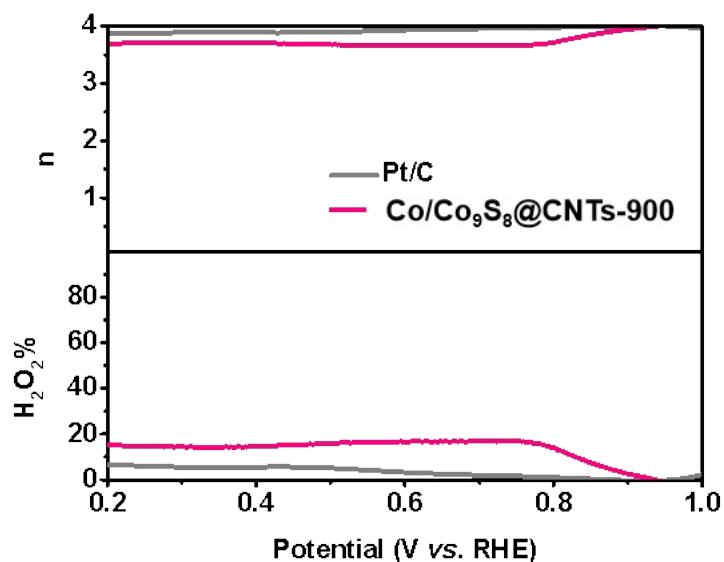

**Figure S15.** The number of transfer electrons ( $n$ ) and H<sub>2</sub>O<sub>2</sub> yield plots of Co/Co<sub>9</sub>S<sub>8</sub>@CNTs-900 and 20 wt% Pt/C from 0.2 V to 0.9 V (vs. RHE).

**Table S3.** The comparison of catalytic performances for ORR in 0.1 M KOH between Co/Co<sub>9</sub>S<sub>8</sub>@CNTs-900 and other Co-based materials reported in the literature.

| Catalysts                                   | Catalyst loading (mg cm <sup>-2</sup> ) | $E_{1/2}$ (V vs. RHE) | limiting current density | Tafel slope (mV dec <sup>-1</sup> ) | Ref.      |
|---------------------------------------------|-----------------------------------------|-----------------------|--------------------------|-------------------------------------|-----------|
| Co/Co <sub>9</sub> S <sub>8</sub> @CNTs-900 | 0.40                                    | 0.925                 | 5.106                    | 48                                  | This work |
| Co/Co <sub>9</sub> S <sub>8</sub> @CNTs-800 | 0.40                                    | 0.895                 | 4.24                     | 123                                 | This work |

|                                                 |             |              |             |           |                  |
|-------------------------------------------------|-------------|--------------|-------------|-----------|------------------|
| <b>Co/Co<sub>9</sub>S<sub>8</sub>@CNTs-1000</b> | <b>0.40</b> | <b>0.907</b> | <b>5.25</b> | <b>85</b> | <b>This work</b> |
| Co/CNFs (1000)                                  | --          | 0.896        | --          | 73        | Ref. 1           |
| Co-Co <sub>9</sub> S <sub>8</sub> @SN-CNTs-900  | 0.40        | 0.810        | ----        | --        | Ref. 2           |
| Co <sub>2</sub> P/CoN-in-NCNTs                  | 0.10        | 0.850        | 5.01        | 49        | Ref. 3           |
| Co@N-CNTF-2                                     | 0.28        | 0.810        | --          | 47.6      | Ref. 4           |
| CF-NG-Co                                        | 0.28        | 0.88         | 5.5         | 44        | Ref. 5           |
| Co/CoP-HNC                                      | 0.19        | 0.83         | --          | 59.4      | Ref. 6           |
| NS/rGO-Co <sub>2</sub>                          | 0.485       | 0.84         | 5.964       | 52        | Ref. 7           |
| Co <sub>3</sub> O <sub>4</sub> /NCMTs           | 0.28        | 0.778        | 4.5         | 42.9      | Ref. 8           |
| Co <sub>3</sub> O <sub>4</sub> -PPy/GN          | 0.20        | 0.77         | 4.471       | --        | Ref. 9           |
| Co <sub>9</sub> S <sub>8</sub> -NSHPCNF         | 0.30        | 0.82         | 4.81        | 65        | Ref. 10          |
| Co <sub>9</sub> S <sub>8</sub> /CD@NSC          | 0.249       | 0.84         | --          | 76.2      | Ref. 11          |
| OSHs-NSC-Co <sub>9</sub> S <sub>8</sub>         | 0.194       | 0.82         | 5.35        | --        | Ref. 12          |

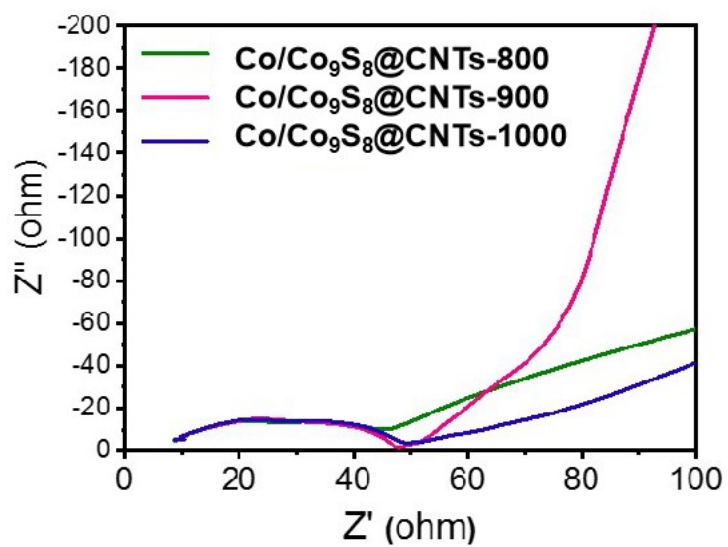

**Figure S16.** The electrochemical impedance spectroscopy of as-prepared Co/Co<sub>9</sub>S<sub>8</sub>@CNTs.

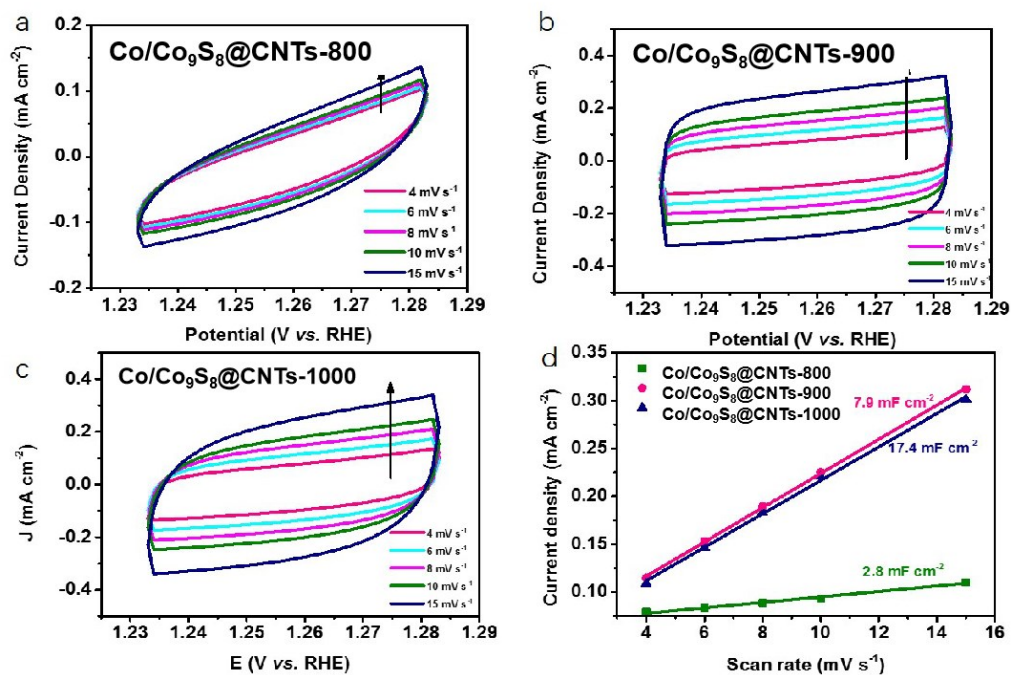

**Figure S17.** Cyclic voltammograms curves for **a)** Co/Co<sub>9</sub>S<sub>8</sub>@CNTs-800, **b)** Co/Co<sub>9</sub>S<sub>8</sub>@CNTs-900, **c)** Co/Co<sub>9</sub>S<sub>8</sub>@CNTs-1000 in the region of 1.233 ~1.283 V vs. RHE at various scan rates. **d)** The electrochemical double-layer capacitances ( $C_{dl}$ ) of various samples.

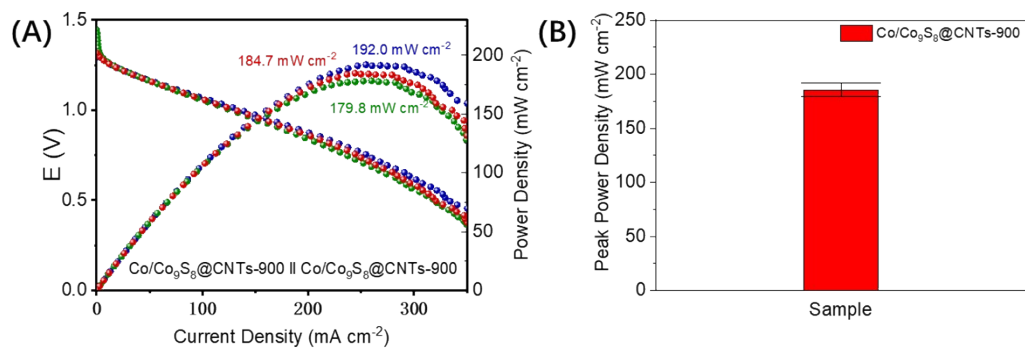

**Figure S18.** (A) The discharging LSV curve tests of Zn-air batteries with Co/Co<sub>9</sub>S<sub>8</sub>@CNTs-900. (B) The peak power density of Zn-air batteries with Co/Co<sub>9</sub>S<sub>8</sub>@CNTs-900.

## Reference:

1. Yang, Z.; Zhao, C.; Qu, Y.; Zhou, H.; Zhou, F.; Wang, J.; Wu, Y.; Li, Y., Trifunctional Self-Supporting Cobalt-Embedded Carbon Nanotube Films for ORR, OER, and HER Triggered by Solid Diffusion from Bulk Metal. *Adv. Mater.* **2019**, *31* (12), 1808043.
2. Han, H.; Bai, Z.; Zhang, T.; Wang, X.; Yang, X.; Ma, X.; Zhang, Y.; Yang, L.; Lu, J., Hierarchical design and development of nanostructured trifunctional catalysts for electrochemical oxygen and hydrogen reactions. *Nano Energy* **2019**, *56*, 724-732.
3. Guo, Y.; Yuan, P.; Zhang, J.; Xia, H.; Cheng, F.; Zhou, M.; Li, J.; Qiao, Y.; Mu, S.; Xu, Q., Co<sub>2</sub>P–CoN Double Active Centers Confined in N-Doped Carbon Nanotube: Heterostructural Engineering for Trifunctional Catalysis toward HER, ORR, OER, and Zn–Air Batteries Driven Water Splitting. *Adv. Funct. Mater.* **2018**, *28* (51), 1805641.
4. Guo, H.; Feng, Q.; Zhu, J.; Xu, J.; Li, Q.; Liu, S.; Xu, K.; Zhang, C.; Liu, T., Cobalt nanoparticle-embedded nitrogen-doped carbon/carbon nanotube frameworks derived from a metal–organic framework for tri-functional ORR, OER and HER electrocatalysis. *J Mater. Chem. A* **2019**, *7* (8), 3664-3672.
5. Pei, Z.; Tang, Z.; Liu, Z.; Huang, Y.; Wang, Y.; Li, H.; Xue, Q.; Zhu, M.; Tang, D.; Zhi, C., Construction of a hierarchical 3D Co/N-carbon electrocatalyst for efficient oxygen reduction and overall water splitting. *J Mater. Chem. A* **2018**, *6* (2), 489-497.
6. Hao, Y.; Xu, Y.; Liu, W.; Sun, X., Co/CoP embedded in a hairy nitrogen-doped carbon polyhedron as an advanced tri-functional electrocatalyst. *Materials Horizons*

2018, 5 (1), 108-115.

7. Wang, N.; Li, L.; Zhao, D.; Kang, X.; Tang, Z.; Chen, S., Graphene Composites with Cobalt Sulfide: Efficient Trifunctional Electrocatalysts for Oxygen Reversible Catalysis and Hydrogen Production in the Same Electrolyte. *Small* **2017**, *13* (33), 1701025.

8. Wang, B.; Xu, L.; Liu, G.; Zhang, P.; Zhu, W.; Xia, J.; Li, H., Biomass willow catkin-derived Co<sub>3</sub>O<sub>4</sub>/N-doped hollow hierarchical porous carbon microtubes as an effective tri-functional electrocatalyst. *J Mater. Chem. A* **2017**, *5* (38), 20170-20179.

9. Ren, G.; Li, Y.; Guo, Z.; Xiao, G.; Zhu, Y.; Dai, L.; Jiang, L., A bio-inspired Co<sub>3</sub>O<sub>4</sub>-polypyrrole-graphene complex as an efficient oxygen reduction catalyst in one-step ball milling. *Nano Research* **2015**, *8* (11), 3461-3471.

10. Peng, W.; Wang, Y.; Yang, X.; Mao, L.; Jin, J.; Yang, S.; Fu, K.; Li, G., Co<sub>9</sub>S<sub>8</sub> nanoparticles embedded in multiple doped and electrospun hollow carbon nanofibers as bifunctional oxygen electrocatalysts for rechargeable zinc-air battery. *Applied Catalysis B: Environmental* **2020**, *268*, 118437.

11. Zhang, P.; Bin, D.; Wei, J.-S.; Niu, X.-Q.; Chen, X.-B.; Xia, Y.-Y.; Xiong, H.-M., Efficient Oxygen Electrocatalyst for Zn–Air Batteries: Carbon Dots and Co<sub>9</sub>S<sub>8</sub> Nanoparticles in a N,S-Codoped Carbon Matrix. *ACS Appl. Mater. Inter.* **2019**, *11* (15), 14085-14094.

12. Tang, K.; Yuan, C.; Xiong, Y.; Hu, H.; Wu, M., Inverse-opal-structured hybrids of N, S-codoped-carbon-confined Co<sub>9</sub>S<sub>8</sub> nanoparticles as bifunctional oxygen electrocatalyst for on-chip all-solid-state rechargeable Zn-air batteries. *Applied*



*Catalysis B: Environmental* **2020**, *260*, 118209.
